# Supplementary material for: Photochemical Synthesis of Transition Metal-Stabilized Uranium(VI) Nitride Complexes
Source: PubMed Central journal article supplement (PMC9249861; doi:10.1038/s41467-022-31582-z), 2022-07-01
Supplement: 41467_2022_31582_MOESM2_ESM.pdf [file 41467_2022_31582_MOESM2_ESM.pdf]

Supplementary Data File 1: Cartesian coordinates of the optimized structures
