# Supplementary material for: Photochemical Synthesis of Transition Metal-Stabilized Uranium(VI) Nitride Complexes
Source: PubMed Central journal article supplement (PMC9249861; doi:10.1038/s41467-022-31582-z), 2022-07-01
Supplement: 41467_2022_31582_MOESM3_ESM.pdf [file 41467_2022_31582_MOESM3_ESM.pdf]

## Cartesian coordinates of all optimized structures

116

Complex 3a Entalpy (a.u) = -2826.491813

U 10.314443 9.864864 9.703125  
Rh 11.408005 12.004927 6.587664  
Rh 6.607920 10.557996 9.821893  
P 13.171387 11.219235 7.981856  
P 7.482385 9.732243 11.877464  
N 9.270109 14.384659 9.971273  
N 11.033857 5.506463 8.387655  
N 7.255592 7.297455 7.865813  
N 8.964175 9.140371 5.676588  
N 10.833014 6.563254 8.793875  
N 7.618388 8.260297 8.370502  
N 9.661477 9.677051 6.412640  
N 9.564256 13.267257 9.957411  
N 10.633315 7.667519 9.235939  
N 11.880234 9.269187 11.734198  
N 9.868280 12.108344 9.950479  
N 8.025171 9.277773 8.907252  
N 9.154297 9.388627 11.737001  
N 12.632185 10.298662 9.322645  
N 10.413552 10.236694 7.193432  
C 6.229225 13.085212 8.178450  
C 11.395725 12.603828 3.611676  
C 3.912146 10.975557 8.320628  
C 9.617023 14.337004 5.539555  
C 12.294641 13.718929 4.167706  
C 10.616449 14.908131 6.561193  
C 15.814996 12.180029 8.866482  
C 11.162070 8.248325 12.507972  
C 5.429295 13.391798 9.456879  
C 13.567250 8.767277 6.644175  
C 3.615368 10.837888 9.824661  
C 14.840461 10.733358 5.710448  
C 13.692452 9.711694 10.140147  
C 13.103087 8.721615 11.133532  
C 9.644044 12.822146 5.503340  
C 13.748874 13.272226 9.830186  
C 12.165193 10.456920 12.546764  
C 14.298251 10.067786 6.975333  
C 7.021564 6.977058 11.449892  
C 8.202353 12.039627 13.319532

C 5.144650 8.225738 12.575504  
C 11.869268 14.074389 6.700136  
C 12.615848 13.515322 5.642240  
C 7.179391 10.237293 14.762668  
C 4.783728 11.217364 10.708119  
C 14.357715 12.576892 8.608945  
C 10.422889 12.063431 4.633272  
C 5.622776 12.333776 10.532939  
C 5.357421 10.657686 7.990024  
C 9.781085 8.754589 12.893464  
C 6.368580 11.607893 7.903616  
C 7.203299 10.881975 13.373086  
C 6.659838 8.106173 12.413736  
H 5.778345 13.594351 7.312683  
H 7.235328 13.500580 8.289620  
H 10.854507 12.947529 2.716888  
H 12.022721 11.767658 3.283367  
H 3.261080 10.295259 7.761714  
H 3.667159 11.983226 7.970498  
H 8.607342 14.669194 5.802160  
H 9.812205 14.733678 4.537952  
H 13.229257 13.744784 3.597086  
H 11.831073 14.700593 4.023900  
H 10.879757 15.946300 6.304275  
H 10.138791 14.951852 7.545704  
H 16.307968 11.779949 7.976775  
H 16.382784 13.065254 9.179347  
H 15.910021 11.437823 9.663452  
H 11.057094 7.372448 11.860967  
H 11.733282 7.952426 13.404975  
H 5.752889 14.360261 9.850915  
H 4.362126 13.496761 9.233185  
H 12.734852 8.946492 5.956494  
H 14.256071 8.062401 6.163833  
H 13.154467 8.292285 7.537000  
H 2.724842 11.425886 10.096523  
H 3.364988 9.793126 10.041962  
H 15.395771 11.654622 5.915965  
H 15.523141 10.049691 5.191600  
H 14.024375 10.977899 5.022941  
H 14.441777 9.163780 9.548151  
H 14.256278 10.479401 10.693932  
H 13.846901 8.462812 11.907108  
H 12.817824 7.804792 10.610842

H 8.800698 12.320526 5.973937  
H 13.852184 12.653878 10.726682  
H 14.266645 14.218860 10.024944  
H 12.683588 13.484217 9.704811  
H 11.232551 10.880401 12.921075  
H 12.819934 10.214743 13.399281  
H 12.644708 11.217826 11.930492  
H 15.144526 9.835203 7.634643  
H 8.093836 6.941291 11.239842  
H 6.719765 6.011444 11.872587  
H 6.503040 7.091419 10.493442  
H 8.257371 12.495737 12.328122  
H 7.922759 12.816664 14.040721  
H 9.210489 11.699268 13.573795  
H 4.665422 8.418525 11.610784  
H 4.735946 7.284806 12.963166  
H 4.847010 9.019468 13.268625  
H 12.398082 14.249011 7.636130  
H 13.663357 13.301334 5.841427  
H 8.145407 9.801667 15.033643  
H 6.948474 11.002029 15.514706  
H 6.421536 9.455200 14.856446  
H 4.705315 10.809980 11.714937  
H 14.362648 13.298501 7.781810  
H 10.109119 11.036226 4.449561  
H 6.170497 12.676784 11.408398  
H 5.535384 9.694061 7.514495  
H 9.871375 9.445217 13.747842  
H 9.217117 7.888080 13.271201  
H 7.267814 11.315298 7.364795  
H 6.201748 11.292681 13.184581  
H 7.092637 7.879357 13.396282

116

Complex 3b Enthalpy (a.u) = -2814.142918

U 10.340545 5.005564 9.670484  
Ir 11.422442 2.856502 6.565016  
Ir 6.622561 4.322550 9.803675  
P 13.193530 3.628919 7.966305  
P 7.510772 5.152499 11.856812  
N 11.128666 9.320273 8.272439  
N 9.284856 0.501188 9.940287  
N 8.950929 5.714274 5.640670  
N 10.889877 8.281968 8.704668

N 7.311101 7.577210 7.797087  
N 9.658909 5.180067 6.365251  
N 9.592726 1.613923 9.933098  
N 11.903693 5.626842 11.690557  
N 7.644964 6.611820 8.313696  
N 10.647766 7.197642 9.174535  
N 10.430755 4.632947 7.140615  
N 9.913807 2.769100 9.935773  
N 12.655752 4.575647 9.289323  
N 9.177770 5.507227 11.698558  
N 8.033960 5.594819 8.869145  
C 11.419535 2.237816 3.581156  
C 9.618330 0.533145 5.497065  
C 10.612015 -0.064999 6.508400  
C 6.235091 1.779840 8.151337  
C 12.315894 1.126694 4.149323  
C 3.921405 3.884561 8.315391  
C 15.800697 2.622268 8.892096  
C 11.853091 0.783174 6.684188  
C 11.186271 6.658290 12.451352  
C 13.717031 5.161962 10.105571  
C 13.638034 6.051380 6.598444  
C 5.454267 1.469470 9.439585  
C 13.701899 1.572621 9.831010  
C 14.904813 4.059549 5.711715  
C 13.129415 6.164939 11.086405  
C 3.619699 3.989883 9.821381  
C 7.014629 7.896244 11.408153  
C 12.185957 4.448750 12.518598  
C 10.469267 2.806769 4.610410  
C 9.806528 6.156048 12.845894  
C 12.624633 1.346455 5.627037  
C 9.668886 2.050524 5.485296  
C 8.244009 2.845309 13.284373  
C 14.339682 2.252500 8.616023  
C 4.810288 3.649918 10.694395  
C 14.349387 4.747583 6.958735  
C 7.230427 4.644785 14.739548  
C 5.368441 4.219472 7.994533  
C 5.162587 6.634860 12.561837  
C 6.389169 3.260930 7.901241  
C 7.244776 4.001836 13.349190  
C 6.674767 6.771793 12.385626  
C 5.668359 2.532311 10.510734

H 12.047085 3.062357 3.225223  
H 10.857835 1.880459 2.704888  
H 8.603820 0.212316 5.754674  
H 9.806962 0.149171 4.488936  
H 10.126782 -0.141327 7.487293  
H 10.889311 -1.091004 6.220885  
H 7.238330 1.352003 8.238200  
H 5.761760 1.292975 7.285055  
H 11.853472 0.143609 4.010418  
H 13.254507 1.096247 3.585720  
H 3.267611 4.570219 7.766619  
H 3.685728 2.881861 7.944518  
H 15.899223 3.356385 9.696125  
H 16.348739 1.724874 9.205107  
H 16.311335 3.020178 8.011519  
H 12.382418 0.566376 7.612222  
H 11.758786 6.966117 13.343324  
H 11.080051 7.525273 11.792657  
H 14.272267 4.395072 10.668926  
H 14.473019 5.698613 9.511921  
H 13.221250 6.546217 7.478615  
H 14.340590 6.740045 6.114739  
H 12.811867 5.868968 5.904083  
H 4.383552 1.365361 9.232285  
H 5.782964 0.501115 9.829393  
H 12.636383 1.373944 9.688918  
H 14.204201 0.620403 10.038158  
H 13.799925 2.194282 10.725945  
H 14.097345 3.815236 5.014645  
H 15.603570 4.730153 5.197294  
H 15.446625 3.135238 5.937469  
H 12.848405 7.077144 10.553338  
H 13.871912 6.429987 11.858929  
H 2.756997 3.360252 10.087620  
H 3.327165 5.020397 10.053857  
H 6.487205 7.765512 10.458564  
H 6.705221 8.861938 11.824918  
H 8.084350 7.943059 11.187418  
H 12.665214 3.679554 11.912691  
H 12.839775 4.701081 13.368722  
H 11.252367 4.030968 12.896573  
H 10.139951 3.822284 4.387589  
H 9.242552 7.026650 13.214072  
H 9.899881 5.476128 13.708529

H 13.681385 1.509678 5.829630  
H 8.799532 2.551173 5.908463  
H 9.252930 3.185353 13.536244  
H 7.968274 2.063868 14.002121  
H 8.293389 2.396567 12.289452  
H 14.339253 1.530211 7.789842  
H 4.704174 4.027290 11.711326  
H 15.186939 4.979261 7.629409  
H 6.474524 5.428045 14.839278  
H 7.002851 3.879159 15.491542  
H 8.198865 5.078127 15.005488  
H 5.526592 5.163853 7.474205  
H 4.881679 5.843157 13.263917  
H 4.746389 7.574016 12.945668  
H 4.678397 6.426825 11.602921  
H 7.265561 3.541382 7.318815  
H 6.241984 3.593378 13.164321  
H 7.114714 7.011289 13.362006  
H 6.189806 2.168664 11.394731

135

Complex 4a Enthalpy (a.u) = -3139.506968

|    |              |              |             |
|----|--------------|--------------|-------------|
| 92 | 10.343275494 | 11.034896561 | 4.359234451 |
| 45 | 8.815400000  | 8.385327000  | 3.278965000 |
| 45 | 8.356138000  | 12.704884000 | 7.189172000 |
| 45 | 8.500183000  | 11.976158000 | 1.632423000 |
| 15 | 10.803771000 | 12.049190000 | 1.146851000 |
| 15 | 10.691142000 | 12.342988000 | 7.620095000 |
| 7  | 6.743356000  | 9.288649000  | 6.154408000 |
| 7  | 11.032298000 | 7.012620000  | 6.289280000 |
| 7  | 9.321059494  | 15.525914561 | 4.044927451 |
| 7  | 10.655631000 | 7.810271000  | 5.552682000 |
| 7  | 7.587573000  | 10.067517000 | 6.124795000 |
| 7  | 12.987591176 | 10.118617588 | 4.404527213 |
| 7  | 9.493478494  | 14.405661561 | 4.290793451 |
| 7  | 9.671517494  | 13.259431561 | 4.577467451 |
| 7  | 11.688092000 | 11.660893000 | 2.555437000 |
| 7  | 11.500214000 | 11.486499000 | 6.352288000 |
| 7  | 10.284382000 | 8.662113000  | 4.774577000 |
| 7  | 8.492596000  | 10.877621000 | 6.113306000 |
| 7  | 9.000926330  | 10.495764851 | 3.072078336 |
| 6  | 6.075570000  | 7.133289000  | 3.382241000 |
| 6  | 6.815761000  | 14.568942000 | 1.663602000 |
| 6  | 6.978316000  | 5.917725000  | 3.638502000 |

|   |              |              |              |
|---|--------------|--------------|--------------|
| 6 | 12.745945000 | 13.584954000 | -0.445967000 |
| 6 | 12.955820000 | 13.705992000 | 8.921021000  |
| 6 | 7.877417000  | 6.798924000  | 0.828149000  |
| 6 | 13.717152000 | 11.255256000 | 3.812607000  |
| 6 | 10.224620000 | 11.874962000 | 10.396477000 |
| 6 | 11.696891000 | 14.713546000 | 1.548995000  |
| 6 | 6.937087000  | 14.061428000 | 9.590669000  |
| 6 | 6.754656000  | 12.567980000 | -0.795905000 |
| 6 | 13.324435176 | 8.889146588  | 3.686426213  |
| 6 | 9.129443000  | 6.088193000  | 1.376775000  |
| 6 | 10.895045000 | 11.258232000 | 9.168703000  |
| 6 | 8.249258000  | 14.806285000 | 7.489458000  |
| 6 | 10.365625000 | 9.849163000  | 8.909911000  |
| 6 | 8.036550000  | 13.969205000 | 0.980008000  |
| 6 | 7.062675000  | 15.395530000 | 6.760519000  |
| 6 | 6.203333000  | 12.736801000 | 9.334783000  |
| 6 | 13.357445000 | 9.948043000  | 5.822080000  |
| 6 | 11.097359000 | 9.362249000  | 0.300333000  |
| 6 | 12.083837000 | 14.647133000 | 6.747425000  |
| 6 | 12.887728000 | 11.130953000 | 6.648563000  |
| 6 | 6.307407000  | 13.709431000 | 2.836891000  |
| 6 | 10.548957000 | 11.021343000 | -1.502024000 |
| 6 | 5.684894000  | 12.136376000 | 0.217991000  |
| 6 | 6.380988000  | 12.234314000 | 7.919966000  |
| 6 | 11.722536000 | 13.897312000 | 8.031673000  |
| 6 | 5.833817000  | 14.468556000 | 6.755900000  |
| 6 | 11.493532000 | 13.685243000 | 0.433990000  |
| 6 | 8.002980000  | 13.103341000 | -0.132614000 |
| 6 | 11.299578000 | 10.791628000 | -0.189576000 |
| 6 | 8.202522000  | 14.182625000 | 8.752316000  |
| 6 | 8.418179000  | 6.347874000  | 3.862036000  |
| 6 | 9.386209000  | 6.399646000  | 2.837158000  |
| 6 | 6.804973000  | 8.255248000  | 2.676435000  |
| 6 | 7.623520000  | 8.124743000  | 1.532770000  |
| 6 | 6.302561000  | 11.538284000 | 1.465696000  |
| 6 | 13.136558000 | 11.596378000 | 2.451925000  |
| 6 | 6.226032000  | 13.001829000 | 6.756893000  |
| 6 | 6.543620000  | 12.232562000 | 2.640918000  |
| 1 | 5.174577000  | 6.847305000  | 2.816714000  |
| 1 | 5.731003000  | 7.529224000  | 4.342156000  |
| 1 | 7.085017000  | 15.557609000 | 2.046930000  |
| 1 | 6.021476000  | 14.731469000 | 0.926694000  |
| 1 | 6.621161000  | 5.375813000  | 4.520524000  |
| 1 | 6.926242000  | 5.206648000  | 2.806481000  |

|   |              |              |              |
|---|--------------|--------------|--------------|
| 1 | 12.606070000 | 12.945712000 | -1.321068000 |
| 1 | 13.004848000 | 14.584705000 | -0.816167000 |
| 1 | 13.615090000 | 13.212703000 | 0.103928000  |
| 1 | 13.732245000 | 13.112456000 | 8.430898000  |
| 1 | 13.394165000 | 14.686354000 | 9.145256000  |
| 1 | 12.723683000 | 13.231990000 | 9.878222000  |
| 1 | 6.995418000  | 6.155691000  | 0.922609000  |
| 1 | 8.002994000  | 6.976650000  | -0.245576000 |
| 1 | 13.562316000 | 12.116641000 | 4.468307000  |
| 1 | 14.805789000 | 11.077436000 | 3.741792000  |
| 1 | 9.142110000  | 11.939480000 | 10.252325000 |
| 1 | 10.410770000 | 11.245766000 | 11.275213000 |
| 1 | 10.596622000 | 12.878094000 | 10.629587000 |
| 1 | 12.484115000 | 14.405894000 | 2.243293000  |
| 1 | 11.993065000 | 15.676428000 | 1.115499000  |
| 1 | 10.794193000 | 14.883981000 | 2.137991000  |
| 1 | 7.200446000  | 14.132682000 | 10.651684000 |
| 1 | 6.281292000  | 14.915110000 | 9.388209000  |
| 1 | 6.342167000  | 13.305281000 | -1.502912000 |
| 1 | 7.043867000  | 11.699367000 | -1.400475000 |
| 1 | 13.005329176 | 8.953444588  | 2.646228213  |
| 1 | 14.411031176 | 8.697812588  | 3.708244213  |
| 1 | 12.815876176 | 8.039544588  | 4.144420213  |
| 1 | 10.005231000 | 6.424859000  | 0.811346000  |
| 1 | 9.062043000  | 5.000463000  | 1.218117000  |
| 1 | 11.972369000 | 11.197143000 | 9.365630000  |
| 1 | 9.206467000  | 15.223923000 | 7.175596000  |
| 1 | 10.857081000 | 9.375679000  | 8.057530000  |
| 1 | 10.533091000 | 9.218786000  | 9.791339000  |
| 1 | 9.290926000  | 9.866411000  | 8.704487000  |
| 1 | 8.939692000  | 14.560342000 | 1.110781000  |
| 1 | 6.808734000  | 16.377993000 | 7.188995000  |
| 1 | 7.377542000  | 15.592477000 | 5.730805000  |
| 1 | 5.132552000  | 12.828685000 | 9.574233000  |
| 1 | 6.599271000  | 11.968994000 | 10.008711000 |
| 1 | 12.864049000 | 9.038789000  | 6.178091000  |
| 1 | 14.444952000 | 9.806410000  | 5.967501000  |
| 1 | 10.037810000 | 9.144473000  | 0.455111000  |
| 1 | 11.495267000 | 8.651856000  | -0.435489000 |
| 1 | 11.593724000 | 9.185116000  | 1.256337000  |
| 1 | 11.206978000 | 14.883370000 | 6.142285000  |
| 1 | 12.587618000 | 15.589126000 | 6.994544000  |
| 1 | 12.761199000 | 14.060007000 | 6.120082000  |
| 1 | 13.567481000 | 11.983348000 | 6.490636000  |



|   |              |              |              |
|---|--------------|--------------|--------------|
| 1 | 13.028835000 | 10.839403000 | 7.698605000  |
| 1 | 5.238463000  | 13.904720000 | 3.017023000  |
| 1 | 6.832805000  | 14.010215000 | 3.747287000  |
| 1 | 10.676653000 | 12.032833000 | -1.900450000 |
| 1 | 10.907090000 | 10.321534000 | -2.267224000 |
| 1 | 9.476925000  | 10.847064000 | -1.365044000 |
| 1 | 5.024695000  | 11.392335000 | -0.241830000 |
| 1 | 5.044093000  | 12.981539000 | 0.486469000  |
| 1 | 6.271790000  | 11.154448000 | 7.821235000  |
| 1 | 11.011021000 | 14.519721000 | 8.590926000  |
| 1 | 5.230418000  | 14.677276000 | 5.866422000  |
| 1 | 5.183609000  | 14.677921000 | 7.612530000  |
| 1 | 10.676030000 | 14.044009000 | -0.205677000 |
| 1 | 8.859081000  | 13.136759000 | -0.805441000 |
| 1 | 12.371065000 | 10.955013000 | -0.361486000 |
| 1 | 9.121306000  | 14.181193000 | 9.332568000  |
| 1 | 8.779843000  | 6.227149000  | 4.882436000  |
| 1 | 10.431122000 | 6.294339000  | 3.137062000  |
| 1 | 6.385029000  | 9.236347000  | 2.886781000  |
| 1 | 7.770356000  | 9.019046000  | 0.927821000  |
| 1 | 6.282265000  | 10.455446000 | 1.511736000  |
| 1 | 13.469643000 | 10.855661000 | 1.704845000  |
| 1 | 13.587909000 | 12.551400000 | 2.144600000  |
| 1 | 6.042086000  | 12.460058000 | 5.830514000  |
| 1 | 6.698969000  | 11.650678000 | 3.547157000  |

135

Complex 4b Enthalpy (a.u) = -3120.985761

|    |              |              |              |
|----|--------------|--------------|--------------|
| 92 | 12.962539295 | 11.409637060 | 13.216194169 |
| 77 | 11.404991000 | 8.801898000  | 12.112508000 |
| 77 | 11.032365000 | 13.169949000 | 15.913298000 |
| 77 | 11.093205000 | 12.392032000 | 10.484007000 |
| 15 | 13.401174000 | 12.502184000 | 10.007978000 |
| 15 | 13.351149000 | 12.722796000 | 16.441239000 |
| 7  | 13.528503000 | 7.414136000  | 15.197047000 |
| 7  | 9.369374000  | 9.674172000  | 15.102328000 |
| 7  | 13.195905000 | 8.196259000  | 14.427314000 |
| 7  | 11.927124295 | 15.844013060 | 12.899845169 |
| 7  | 15.560650705 | 10.472531940 | 13.197476831 |
| 7  | 10.202177000 | 10.457533000 | 15.015583000 |
| 7  | 14.277578000 | 12.097801000 | 11.421578000 |
| 7  | 12.061712295 | 14.745332060 | 13.232309169 |
| 7  | 12.875158000 | 9.043434000  | 13.616516000 |
| 7  | 12.205158295 | 13.619180060 | 13.625925169 |
| 7  | 14.127894000 | 11.817484000 | 15.176504000 |

|   |              |              |              |
|---|--------------|--------------|--------------|
| 7 | 11.107690000 | 11.267179000 | 14.941394000 |
| 7 | 11.584967000 | 10.892521000 | 11.883739000 |
| 6 | 9.543406000  | 6.336288000  | 12.458395000 |
| 6 | 16.312289000 | 11.619379000 | 12.648609000 |
| 6 | 11.706205000 | 6.475966000  | 10.212128000 |
| 6 | 8.645220000  | 7.549653000  | 12.180892000 |
| 6 | 15.679485000 | 14.034069000 | 17.688722000 |
| 6 | 15.726816000 | 12.027645000 | 11.309060000 |
| 6 | 15.336513000 | 14.073511000 | 8.454301000  |
| 6 | 15.939755000 | 10.240161000 | 14.606288000 |
| 6 | 15.878518705 | 9.265653940  | 12.433334831 |
| 6 | 12.896928000 | 12.356142000 | 19.216265000 |
| 6 | 13.155022000 | 11.537788000 | 7.339934000  |
| 6 | 10.981057000 | 6.775076000  | 12.698329000 |
| 6 | 9.739560000  | 14.565420000 | 18.391928000 |
| 6 | 9.373999000  | 14.975297000 | 10.570470000 |
| 6 | 14.820250000 | 14.953410000 | 15.499644000 |
| 6 | 13.539028000 | 11.671158000 | 18.009312000 |
| 6 | 14.273684000 | 15.162638000 | 10.462480000 |
| 6 | 9.336030000  | 13.055344000 | 8.060362000  |
| 6 | 9.017172000  | 13.222940000 | 18.225893000 |
| 6 | 12.946638000 | 10.280281000 | 17.794098000 |
| 6 | 13.897766000 | 11.270586000 | 8.650473000  |
| 6 | 10.472176000 | 7.206516000  | 9.649931000  |
| 6 | 15.497693000 | 11.403014000 | 15.475312000 |
| 6 | 13.678836000 | 9.830911000  | 9.102492000  |
| 6 | 11.965834000 | 6.814636000  | 11.667853000 |
| 6 | 8.281947000  | 12.564581000 | 9.063349000  |
| 6 | 14.446449000 | 14.246004000 | 16.803813000 |
| 6 | 10.940837000 | 14.672231000 | 17.457561000 |
| 6 | 14.079516000 | 14.152884000 | 9.329794000  |
| 6 | 9.397648000  | 8.674981000  | 11.500991000 |
| 6 | 8.424498000  | 14.829972000 | 15.626968000 |
| 6 | 8.862254000  | 14.083169000 | 11.717029000 |
| 6 | 10.235672000 | 8.539375000  | 10.353772000 |
| 6 | 9.597070000  | 15.823925000 | 15.555250000 |
| 6 | 10.589325000 | 13.555031000 | 8.744943000  |
| 6 | 8.911092000  | 13.384480000 | 15.623996000 |
| 6 | 8.920324000  | 11.940764000 | 10.291864000 |
| 6 | 9.190183000  | 12.660723000 | 16.830652000 |
| 6 | 10.611683000 | 14.397044000 | 9.892960000  |
| 6 | 10.869782000 | 15.275571000 | 16.171256000 |
| 6 | 9.144959000  | 12.617386000 | 11.495300000 |
| 1 | 9.175185000  | 5.799649000  | 13.338979000 |

|   |              |              |              |
|---|--------------|--------------|--------------|
| 1 | 9.503063000  | 5.619075000  | 11.630845000 |
| 1 | 16.177145000 | 12.453164000 | 13.342730000 |
| 1 | 17.396782000 | 11.426995000 | 12.560986000 |
| 1 | 11.614272000 | 5.387513000  | 10.075504000 |
| 1 | 12.591280000 | 6.782641000  | 9.643329000  |
| 1 | 7.761541000  | 7.267657000  | 11.587491000 |
| 1 | 8.272702000  | 7.942768000  | 13.132042000 |
| 1 | 16.430305000 | 13.398820000 | 17.211054000 |
| 1 | 16.155182000 | 15.003446000 | 17.882650000 |
| 1 | 15.437882000 | 13.595605000 | 18.660255000 |
| 1 | 16.048920000 | 11.319858000 | 10.527005000 |
| 1 | 16.181966000 | 12.993075000 | 11.042821000 |
| 1 | 15.206750000 | 13.445481000 | 7.569814000  |
| 1 | 15.588740000 | 15.080461000 | 8.099870000  |
| 1 | 16.205873000 | 13.701477000 | 9.004110000  |
| 1 | 15.431540000 | 9.327836000  | 14.930922000 |
| 1 | 17.024517000 | 10.071552000 | 14.739937000 |
| 1 | 15.594067705 | 9.388091940  | 11.388538831 |
| 1 | 16.956735705 | 9.036567940  | 12.477777831 |
| 1 | 15.324912705 | 8.415748940  | 12.835355831 |
| 1 | 11.819976000 | 12.468155000 | 19.062796000 |
| 1 | 13.049721000 | 11.745751000 | 20.114328000 |
| 1 | 13.315472000 | 13.347266000 | 19.419406000 |
| 1 | 13.290457000 | 12.557177000 | 6.965549000  |
| 1 | 13.513733000 | 10.853266000 | 6.561517000  |
| 1 | 12.081689000 | 11.366898000 | 7.468846000  |
| 1 | 11.338532000 | 6.603082000  | 13.713666000 |
| 1 | 10.077783000 | 14.682204000 | 19.427401000 |
| 1 | 9.057692000  | 15.402022000 | 18.203933000 |
| 1 | 9.628144000  | 15.958789000 | 10.976613000 |
| 1 | 8.587873000  | 15.145599000 | 9.826534000  |
| 1 | 13.943868000 | 15.202345000 | 14.899384000 |
| 1 | 15.355374000 | 15.884708000 | 15.719760000 |
| 1 | 15.474059000 | 14.331342000 | 14.880516000 |
| 1 | 14.614344000 | 11.572552000 | 18.202194000 |
| 1 | 15.065113000 | 14.850375000 | 11.150245000 |
| 1 | 14.560403000 | 16.135619000 | 10.045839000 |
| 1 | 13.368991000 | 15.312918000 | 11.053283000 |
| 1 | 8.913802000  | 13.829560000 | 7.400945000  |
| 1 | 9.622938000  | 12.222437000 | 7.406327000  |
| 1 | 7.948602000  | 13.313421000 | 18.473992000 |
| 1 | 9.432918000  | 12.494298000 | 18.931235000 |
| 1 | 13.418618000 | 9.755896000  | 16.960221000 |
| 1 | 13.080824000 | 9.671534000  | 18.696088000 |

|   |              |              |              |
|---|--------------|--------------|--------------|
| 1 | 11.874663000 | 10.344115000 | 17.583934000 |
| 1 | 14.971338000 | 11.430577000 | 8.488836000  |
| 1 | 10.610059000 | 7.382492000  | 8.577489000  |
| 1 | 9.578008000  | 6.578894000  | 9.735878000  |
| 1 | 16.206291000 | 12.237960000 | 15.358131000 |
| 1 | 15.612910000 | 11.067918000 | 16.515446000 |
| 1 | 12.615511000 | 9.614902000  | 9.230766000  |
| 1 | 14.087700000 | 9.137326000  | 8.356952000  |
| 1 | 14.153876000 | 9.624999000  | 10.063343000 |
| 1 | 13.002950000 | 6.652475000  | 11.973500000 |
| 1 | 7.637637000  | 11.818878000 | 8.584524000  |
| 1 | 7.621191000  | 13.384043000 | 9.362275000  |
| 1 | 13.762688000 | 14.907480000 | 17.351845000 |
| 1 | 11.891311000 | 14.751257000 | 17.978669000 |
| 1 | 13.260160000 | 14.514748000 | 8.694629000  |
| 1 | 8.939155000  | 9.646392000  | 11.674511000 |
| 1 | 7.763628000  | 14.990722000 | 14.768798000 |
| 1 | 7.805765000  | 15.017481000 | 16.512906000 |
| 1 | 7.784250000  | 14.242001000 | 11.875903000 |
| 1 | 9.356865000  | 14.375341000 | 12.647412000 |
| 1 | 10.346598000 | 9.423121000  | 9.724816000  |
| 1 | 9.335785000  | 16.786188000 | 16.022993000 |
| 1 | 9.817927000  | 16.051700000 | 14.507114000 |
| 1 | 11.430739000 | 13.647809000 | 8.057865000  |
| 1 | 8.574551000  | 12.789043000 | 14.775086000 |
| 1 | 8.864645000  | 10.858720000 | 10.325727000 |
| 1 | 9.039618000  | 11.580731000 | 16.794184000 |
| 1 | 11.494381000 | 15.020524000 | 10.018767000 |
| 1 | 11.776931000 | 15.759037000 | 15.802859000 |
| 1 | 9.249852000  | 12.017974000 | 12.398084000 |

130

Complex 5a Enthalpy (a.u) = -2865.933591

|    |              |             |              |
|----|--------------|-------------|--------------|
| 92 | 7.187553086  | 4.999910214 | 5.868884252  |
| 45 | 8.093829719  | 7.728717073 | 7.372509446  |
| 45 | 10.159493000 | 4.984626000 | 5.473424000  |
| 45 | 8.085342738  | 2.271896470 | 7.376827781  |
| 15 | 6.045476000  | 8.067455000 | 6.268718000  |
| 15 | 6.046705000  | 1.937363000 | 6.278910000  |
| 7  | 5.693711000  | 6.672556000 | 5.348205000  |
| 7  | 6.368778457  | 4.988850242 | 3.248757520  |
| 7  | 8.621698000  | 6.330299000 | 5.954901000  |
| 7  | 6.539269086  | 5.025695214 | 8.076013252  |
| 7  | 6.324612086  | 4.992727214 | 9.248890252  |
| 7  | 6.094670086  | 4.965168214 | 10.386189252 |

|   |              |              |              |
|---|--------------|--------------|--------------|
| 7 | 5.695505000  | 3.346621000  | 5.381970000  |
| 7 | 8.606979000  | 3.686468000  | 6.012761000  |
| 6 | 4.803713000  | 6.667512000  | 4.199887000  |
| 6 | 5.573629000  | 6.231279000  | 2.954091000  |
| 6 | 7.490282457  | 4.941604242  | 2.301534520  |
| 6 | 6.278057000  | 9.485160000  | 5.023982000  |
| 6 | 7.567026000  | 9.291957000  | 4.223697000  |
| 6 | 6.258560000  | 10.867748000 | 5.678519000  |
| 6 | 4.453438000  | 8.550050000  | 7.188719000  |
| 6 | 3.296905000  | 8.991445000  | 6.285592000  |
| 6 | 3.998846000  | 7.407182000  | 8.097560000  |
| 6 | 10.035626719 | 8.673339073  | 7.425736446  |
| 6 | 10.097134719 | 7.582606073  | 8.297351446  |
| 6 | 10.037069719 | 7.702300073  | 9.807067446  |
| 6 | 8.593041719  | 7.598086073  | 10.333162446 |
| 6 | 7.562997719  | 8.173645073  | 9.386963446  |
| 6 | 7.657520719  | 9.407119073  | 8.714497446  |
| 6 | 8.822811719  | 10.371418073 | 8.876138446  |
| 6 | 9.919693719  | 10.125927073 | 7.829056446  |
| 6 | 11.763395000 | 6.413021000  | 5.326559000  |
| 6 | 11.146307000 | 6.268442000  | 4.070343000  |
| 6 | 11.764398000 | 5.519918000  | 2.897534000  |
| 6 | 13.086551000 | 5.804851000  | 5.733729000  |
| 6 | 4.760062000  | 3.387625000  | 4.271473000  |
| 6 | 5.494470000  | 3.789541000  | 2.990950000  |
| 6 | 6.259283000  | 0.542050000  | 5.005419000  |
| 6 | 7.534765000  | 0.754374000  | 4.188784000  |
| 6 | 6.255498000  | -0.854557000 | 5.629671000  |
| 6 | 4.467549000  | 1.448476000  | 7.216650000  |
| 6 | 3.301694000  | 0.981782000  | 6.338316000  |
| 6 | 4.013477000  | 2.598188000  | 8.117517000  |
| 6 | 11.859717000 | 3.625185000  | 5.358150000  |
| 6 | 11.035603000 | 3.476267000  | 4.231091000  |
| 6 | 11.345638000 | 4.036115000  | 2.859181000  |
| 6 | 13.206328000 | 4.329305000  | 5.325269000  |
| 6 | 10.078514738 | 1.433609470  | 7.437389781  |
| 6 | 10.061782738 | 2.486571470  | 8.354011781  |
| 6 | 9.976833738  | 2.304595470  | 9.855838781  |
| 6 | 8.519283738  | 2.319409470  | 10.354192781 |
| 6 | 7.537930738  | 1.730010470  | 9.365843781  |
| 6 | 7.707592738  | 0.530430470  | 8.648160781  |
| 6 | 8.918445738  | -0.379740530 | 8.791933781  |
| 6 | 10.021965738 | -0.038484530 | 7.777647781  |
| 1 | 4.383046000  | 7.658844000  | 3.984383000  |

|   |              |              |              |
|---|--------------|--------------|--------------|
| 1 | 3.935509000  | 6.016243000  | 4.368561000  |
| 1 | 4.895602000  | 6.135656000  | 2.087053000  |
| 1 | 6.292836000  | 7.020964000  | 2.720203000  |
| 1 | 8.078360457  | 4.038482242  | 2.477627520  |
| 1 | 7.150576457  | 4.944754242  | 1.251828520  |
| 1 | 5.423199000  | 9.415176000  | 4.337933000  |
| 1 | 7.682502000  | 8.266485000  | 3.865190000  |
| 1 | 8.438743000  | 9.503809000  | 4.849755000  |
| 1 | 7.584406000  | 9.973155000  | 3.363600000  |
| 1 | 7.095371000  | 10.977712000 | 6.374497000  |
| 1 | 5.332754000  | 11.074549000 | 6.222983000  |
| 1 | 6.365871000  | 11.642648000 | 4.909539000  |
| 1 | 4.748934000  | 9.400952000  | 7.817195000  |
| 1 | 2.914754000  | 8.152279000  | 5.696422000  |
| 1 | 3.562790000  | 9.798248000  | 5.596938000  |
| 1 | 2.465963000  | 9.352477000  | 6.903839000  |
| 1 | 4.746576000  | 7.141358000  | 8.846175000  |
| 1 | 3.787945000  | 6.506578000  | 7.513062000  |
| 1 | 3.082021000  | 7.693096000  | 8.626851000  |
| 1 | 10.393717719 | 8.527553073  | 6.409648446  |
| 1 | 10.477746719 | 6.645877073  | 7.894158446  |
| 1 | 10.499474719 | 8.642824073  | 10.127086446 |
| 1 | 10.639307719 | 6.904995073  | 10.255865446 |
| 1 | 8.338596719  | 6.544752073  | 10.487658446 |
| 1 | 8.503367719  | 8.076079073  | 11.321793446 |
| 1 | 6.562271719  | 7.774276073  | 9.547745446  |
| 1 | 6.719391719  | 9.877768073  | 8.431040446  |
| 1 | 8.457883719  | 11.400820073 | 8.784903446  |
| 1 | 9.230481719  | 10.291411073 | 9.889952446  |
| 1 | 10.893095719 | 10.499699073 | 8.184353446  |
| 1 | 9.685921719  | 10.701203073 | 6.925872446  |
| 1 | 11.492887000 | 7.286623000  | 5.908235000  |
| 1 | 10.403101000 | 7.020262000  | 3.807334000  |
| 1 | 12.855832000 | 5.607895000  | 2.940713000  |
| 1 | 11.466298000 | 6.005649000  | 1.961101000  |
| 1 | 13.929639000 | 6.390691000  | 5.332821000  |
| 1 | 4.289774000  | 2.414345000  | 4.076488000  |
| 1 | 3.929130000  | 4.074725000  | 4.478793000  |
| 1 | 4.783198000  | 3.925406000  | 2.157113000  |
| 1 | 6.155144000  | 2.961103000  | 2.721611000  |
| 1 | 8.143529457  | 5.801915242  | 2.463559520  |
| 1 | 5.392537000  | 0.626295000  | 4.335667000  |
| 1 | 7.635860000  | 1.784992000  | 3.840853000  |
| 1 | 8.416920000  | 0.540927000  | 4.799899000  |

|   |              |              |              |
|---|--------------|--------------|--------------|
| 1 | 7.545038000  | 0.084482000  | 3.319769000  |
| 1 | 7.119138000  | -0.984154000 | 6.288403000  |
| 1 | 5.351434000  | -1.068418000 | 6.206977000  |
| 1 | 6.326912000  | -1.613136000 | 4.840511000  |
| 1 | 4.783161000  | 0.609501000  | 7.851928000  |
| 1 | 2.892297000  | 1.810814000  | 5.753128000  |
| 1 | 3.567838000  | 0.176612000  | 5.648072000  |
| 1 | 2.489610000  | 0.609400000  | 6.974640000  |
| 1 | 4.773039000  | 2.891200000  | 8.843909000  |
| 1 | 3.771800000  | 3.484635000  | 7.523291000  |
| 1 | 3.114716000  | 2.304823000  | 8.672990000  |
| 1 | 11.745352000 | 2.912311000  | 6.167918000  |
| 1 | 10.320378000 | 2.654348000  | 4.238357000  |
| 1 | 12.118656000 | 3.432113000  | 2.357530000  |
| 1 | 10.442672000 | 3.934595000  | 2.246996000  |
| 1 | 13.649607000 | 4.240131000  | 4.327037000  |
| 1 | 10.447470738 | 1.645436470  | 6.436989781  |
| 1 | 10.390952738 | 3.460430470  | 7.995799781  |
| 1 | 10.477469738 | 1.375124470  | 10.149058781 |
| 1 | 10.531050738 | 3.111354470  | 10.347667781 |
| 1 | 8.209729738  | 3.352375470  | 10.542257781 |
| 1 | 8.435420738  | 1.800332470  | 11.322453781 |
| 1 | 6.514920738  | 2.070255470  | 9.523179781  |
| 1 | 6.799775738  | 0.023915470  | 8.328780781  |
| 1 | 8.608005738  | -1.421378530 | 8.650975781  |
| 1 | 9.303766738  | -0.322897530 | 9.816025781  |
| 1 | 11.004280738 | -0.383561530 | 8.137485781  |
| 1 | 9.832086738  | -0.585008530 | 6.846713781  |
| 1 | 13.160361000 | 5.879825000  | 6.825445000  |
| 1 | 13.898004000 | 3.816072000  | 6.003086000  |

130

Complex 5b Enthalpy (a.u) = 2847.420357

|    |              |             |             |
|----|--------------|-------------|-------------|
| 92 | 13.591874935 | 4.989675318 | 5.099521649 |
| 77 | 12.680630000 | 2.217052000 | 3.564813000 |
| 77 | 10.622541000 | 4.998042000 | 5.510872000 |
| 77 | 12.630636000 | 7.791798000 | 3.596381000 |
| 15 | 14.723598000 | 1.927210000 | 4.730127000 |
| 15 | 14.731287000 | 8.051152000 | 4.649323000 |
| 7  | 15.052609829 | 3.323095373 | 5.662391819 |
| 7  | 14.385104671 | 5.069485628 | 7.737382889 |
| 7  | 12.128133225 | 3.664617040 | 4.959005760 |
| 7  | 14.240390935 | 4.950676318 | 2.907541649 |
| 7  | 14.370462935 | 5.011826318 | 1.721713649 |

|   |              |              |             |
|---|--------------|--------------|-------------|
| 7 | 14.527652935 | 5.067255318  | 0.575097649 |
| 7 | 15.093723996 | 6.641537036  | 5.543461152 |
| 7 | 12.143630344 | 6.326635605  | 4.987950732 |
| 6 | 15.909183000 | 3.325399000  | 6.833654000 |
| 6 | 15.115707000 | 3.806019000  | 8.046351000 |
| 6 | 13.251514671 | 5.188220628  | 8.665107889 |
| 6 | 14.498173000 | 0.506490000  | 5.970957000 |
| 6 | 14.524489000 | -0.873740000 | 5.311918000 |
| 6 | 13.209808000 | 0.689671000  | 6.773857000 |
| 6 | 16.324745000 | 1.469839000  | 3.820145000 |
| 6 | 17.477873000 | 1.040832000  | 4.732874000 |
| 6 | 16.768875000 | 2.620410000  | 2.916530000 |
| 6 | 10.762047000 | 1.247314000  | 3.525852000 |
| 6 | 10.702930000 | 2.322206000  | 2.609475000 |
| 6 | 10.756930000 | 2.145192000  | 1.102099000 |
| 6 | 12.199639000 | 2.229510000  | 0.570258000 |
| 6 | 13.227246000 | 1.728533000  | 1.564052000 |
| 6 | 13.141112000 | 0.505021000  | 2.284223000 |
| 6 | 11.988398000 | -0.478625000 | 2.125246000 |
| 6 | 10.873422000 | -0.213945000 | 3.148053000 |
| 6 | 8.986497000  | 3.607766000  | 5.505373000 |
| 6 | 9.570837000  | 3.638325000  | 6.799371000 |
| 6 | 8.913894000  | 4.294107000  | 8.007959000 |
| 6 | 7.677407000  | 4.269669000  | 5.130402000 |
| 6 | 16.034319000 | 6.591009000  | 6.645786000 |
| 6 | 15.296581000 | 6.237974000  | 7.938871000 |
| 6 | 14.581736000 | 9.452705000  | 5.923958000 |
| 6 | 14.611646000 | 10.847714000 | 5.296695000 |
| 6 | 13.318851000 | 9.279072000  | 6.769056000 |
| 6 | 16.282295000 | 8.513564000  | 3.658291000 |
| 6 | 17.488154000 | 8.927742000  | 4.508592000 |
| 6 | 16.675545000 | 7.376373000  | 2.714854000 |
| 6 | 8.957951000  | 6.377307000  | 5.694272000 |
| 6 | 9.755781000  | 6.401065000  | 6.868129000 |
| 6 | 9.363408000  | 5.757479000  | 8.182274000 |
| 6 | 7.586512000  | 5.716291000  | 5.637203000 |
| 6 | 10.677567000 | 8.703645000  | 3.626315000 |
| 6 | 10.619406000 | 7.643570000  | 2.697577000 |
| 6 | 10.627436000 | 7.840028000  | 1.192613000 |
| 6 | 12.056011000 | 7.795960000  | 0.619331000 |
| 6 | 13.099350000 | 8.316402000  | 1.585810000 |
| 6 | 13.004107000 | 9.528765000  | 2.324648000 |
| 6 | 11.820459000 | 10.482786000 | 2.218736000 |
| 6 | 10.744748000 | 10.173283000 | 3.271379000 |



|   |              |              |              |
|---|--------------|--------------|--------------|
| 1 | 16.800797000 | 3.948236000  | 6.680746000  |
| 1 | 16.294339000 | 2.326217000  | 7.076186000  |
| 1 | 14.361423000 | 3.046666000  | 8.269535000  |
| 1 | 15.767933000 | 3.894571000  | 8.933528000  |
| 1 | 12.703415671 | 6.108979628  | 8.456085889  |
| 1 | 13.576574671 | 5.198013628  | 9.719172889  |
| 1 | 15.354121000 | 0.577665000  | 6.655075000  |
| 1 | 13.682583000 | -0.988408000 | 4.623626000  |
| 1 | 14.431778000 | -1.650518000 | 6.080741000  |
| 1 | 15.447536000 | -1.070627000 | 4.759037000  |
| 1 | 13.095756000 | 1.708945000  | 7.149889000  |
| 1 | 13.193285000 | -0.003569000 | 7.624063000  |
| 1 | 12.338932000 | 0.488364000  | 6.143660000  |
| 1 | 16.042857000 | 0.617419000  | 3.187860000  |
| 1 | 17.831789000 | 1.878235000  | 5.342076000  |
| 1 | 18.325715000 | 0.709418000  | 4.121246000  |
| 1 | 17.220260000 | 0.216280000  | 5.403332000  |
| 1 | 16.007154000 | 2.893892000  | 2.185210000  |
| 1 | 17.676984000 | 2.337589000  | 2.371010000  |
| 1 | 16.990539000 | 3.514811000  | 3.506618000  |
| 1 | 10.334712000 | 1.405136000  | 4.513776000  |
| 1 | 10.259731000 | 3.249521000  | 2.968396000  |
| 1 | 10.152445000 | 2.925878000  | 0.628051000  |
| 1 | 10.292005000 | 1.194162000  | 0.817914000  |
| 1 | 12.299287000 | 1.687250000  | -0.383276000 |
| 1 | 12.444446000 | 3.273560000  | 0.349792000  |
| 1 | 14.230041000 | 2.107205000  | 1.362824000  |
| 1 | 14.086510000 | 0.036703000  | 2.548867000  |
| 1 | 11.596960000 | -0.430982000 | 1.102997000  |
| 1 | 12.362400000 | -1.501173000 | 2.250379000  |
| 1 | 11.085842000 | -0.776059000 | 4.064869000  |
| 1 | 9.902962000  | -0.582730000 | 2.780568000  |
| 1 | 9.218760000  | 2.751074000  | 4.882372000  |
| 1 | 10.259818000 | 2.826845000  | 7.035069000  |
| 1 | 7.823791000  | 4.235646000  | 7.913354000  |
| 1 | 9.163152000  | 3.723878000  | 8.910323000  |
| 1 | 6.821589000  | 3.673336000  | 5.484956000  |
| 1 | 7.613667000  | 4.269831000  | 4.035439000  |
| 1 | 16.838692000 | 5.872712000  | 6.442452000  |
| 1 | 16.538721000 | 7.551779000  | 6.814261000  |
| 1 | 14.672606000 | 7.095639000  | 8.202894000  |
| 1 | 16.008400000 | 6.084109000  | 8.768479000  |
| 1 | 12.565072671 | 4.352507628  | 8.512708889  |
| 1 | 15.460465000 | 9.344542000  | 6.574253000  |

|   |              |              |              |
|---|--------------|--------------|--------------|
| 1 | 13.745436000 | 10.995412000 | 4.645645000  |
| 1 | 14.564573000 | 11.607611000 | 6.086279000  |
| 1 | 15.515512000 | 11.040516000 | 4.711977000  |
| 1 | 13.187318000 | 8.250080000  | 7.111485000  |
| 1 | 13.354871000 | 9.941070000  | 7.643312000  |
| 1 | 12.431561000 | 9.529181000  | 6.180271000  |
| 1 | 15.965609000 | 9.375808000  | 3.056112000  |
| 1 | 17.895807000 | 8.072735000  | 5.056570000  |
| 1 | 18.286979000 | 9.297307000  | 3.854418000  |
| 1 | 17.266088000 | 9.720035000  | 5.228740000  |
| 1 | 15.892553000 | 7.138031000  | 1.993815000  |
| 1 | 17.574128000 | 7.654879000  | 2.151579000  |
| 1 | 16.894852000 | 6.463016000  | 3.275866000  |
| 1 | 9.079549000  | 7.195373000  | 4.993123000  |
| 1 | 10.456175000 | 7.231621000  | 6.968308000  |
| 1 | 8.581388000  | 6.346686000  | 8.686571000  |
| 1 | 10.237712000 | 5.788678000  | 8.842373000  |
| 1 | 7.111649000  | 5.751678000  | 6.624565000  |
| 1 | 6.934287000  | 6.297203000  | 4.975399000  |
| 1 | 10.293066000 | 8.513749000  | 4.626074000  |
| 1 | 10.222589000 | 6.696423000  | 3.060283000  |
| 1 | 10.027364000 | 7.051544000  | 0.725854000  |
| 1 | 10.133932000 | 8.783943000  | 0.934455000  |
| 1 | 12.112924000 | 8.346107000  | -0.333172000 |
| 1 | 12.321595000 | 6.759794000  | 0.385584000  |
| 1 | 14.104450000 | 7.969564000  | 1.344436000  |
| 1 | 13.945497000 | 10.019377000 | 2.563033000  |
| 1 | 11.397982000 | 10.441114000 | 1.208580000  |
| 1 | 12.170352000 | 11.513132000 | 2.349438000  |
| 1 | 10.973174000 | 10.724576000 | 4.190895000  |
| 1 | 9.755244000  | 10.526107000 | 2.940833000  |
